# Supplementary material for: A novel Fe/N/C electrocatalyst prepared from a carbon-supported iron(ii) complex of macrocyclic ligands for oxygen reduction reaction
Source: Royal Society of Chemistry journal article supplement (doi:10.1039/d0ra09730f), 2021-01-01
Supplement: d0ra09730f1.pdf [file d0ra09730f1.pdf]

## Supporting Information

### A Novel Fe/N/C Electrocatalyst Prepared from Carbon-Supported Iron( II ) Complex of Macrocyclic Ligands for Oxygen Reduction Reaction

Dawei Xu,<sup>a</sup> Yuanyuan Fu,<sup>a</sup> Yefei Wang,<sup>a</sup> Xuhui Li,<sup>a</sup> Kai Li,<sup>a</sup> Zhongfeng Li,<sup>a</sup>

Lirong Zheng,<sup>b</sup> and Xia Zuo<sup>\*a</sup>

<sup>a</sup>Department of Chemistry, Capital Normal University, Beijing 100048, China.

<sup>b</sup>Dr. L. Zheng Department Beijing Synchrotron Radiation Facility Institute of High Energy Physics, Chinese Academy of Sciences, Beijing 100049, P. R. China.

Corresponding Authors: Xia Zuo – Department of Chemistry, Capital Normal University, Beijing 100048, China; orcid.org/0000-0001-5205-5300; Email: zuoxia@mail.cnu.edu.cn

Authors: Dawei Xu - Department of Chemistry, Capital Normal University, Beijing 100048, China; Email: 2180702049@cnu.edu.cn

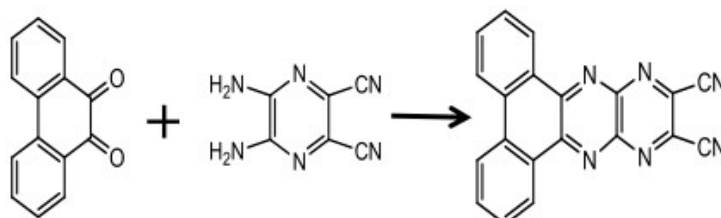

**Figure S1** Synthetic procedure of 2,3-DCTBT

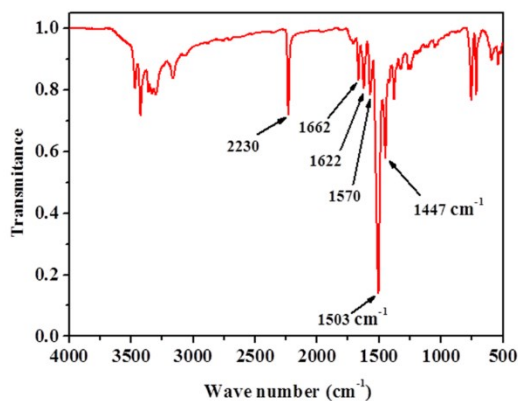

**Figure S2.** The IR spectrum of 2, 3-DCTBT.

Figure. S2 shows the FTIR of 2,3 - DCTBT. There are two absorption peaks at 1503 cm<sup>-1</sup> and 1622 cm<sup>-1</sup>, which are the two characteristic absorption peaks of benzene ring. Three obvious peaks at 1662cm<sup>-1</sup>,1570cm<sup>-1</sup> and 1447cm<sup>-1</sup> are the absorption peaks of C = N. There is a strong absorption peak at 2230cm<sup>-1</sup>, which is absorption peak of -CN. Generally, strong absorption peaks appear at 1700 cm<sup>-1</sup> for carbonyl group, and obvious double peaks appear at 3300 cm<sup>-1</sup> – 3600 cm<sup>-1</sup> for amino group. These characteristic absorption peaks do not appear in Figure S1, indicating that there is no carbonyl and amino group in organic matter, which is consistent with the literature report, indicating that 2,3 - DCTBT is successfully synthesized.

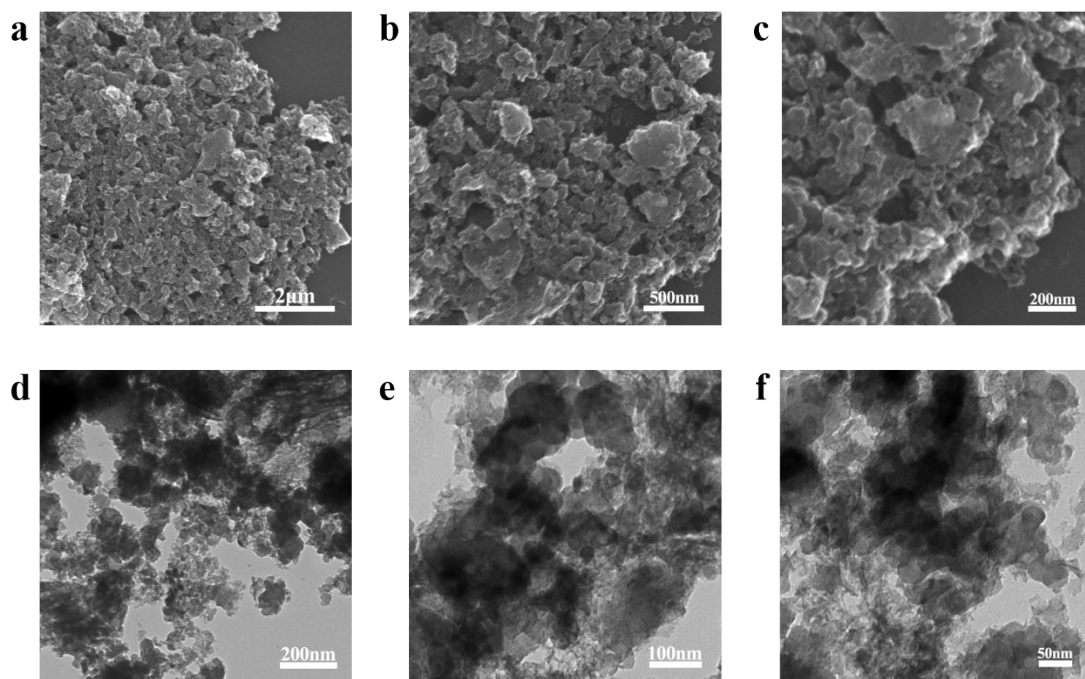

**Figure S3.** a), b) and c) SEM images of Fe/N/C-800. d), e) and f) TEM images of Fe/N/C-800.

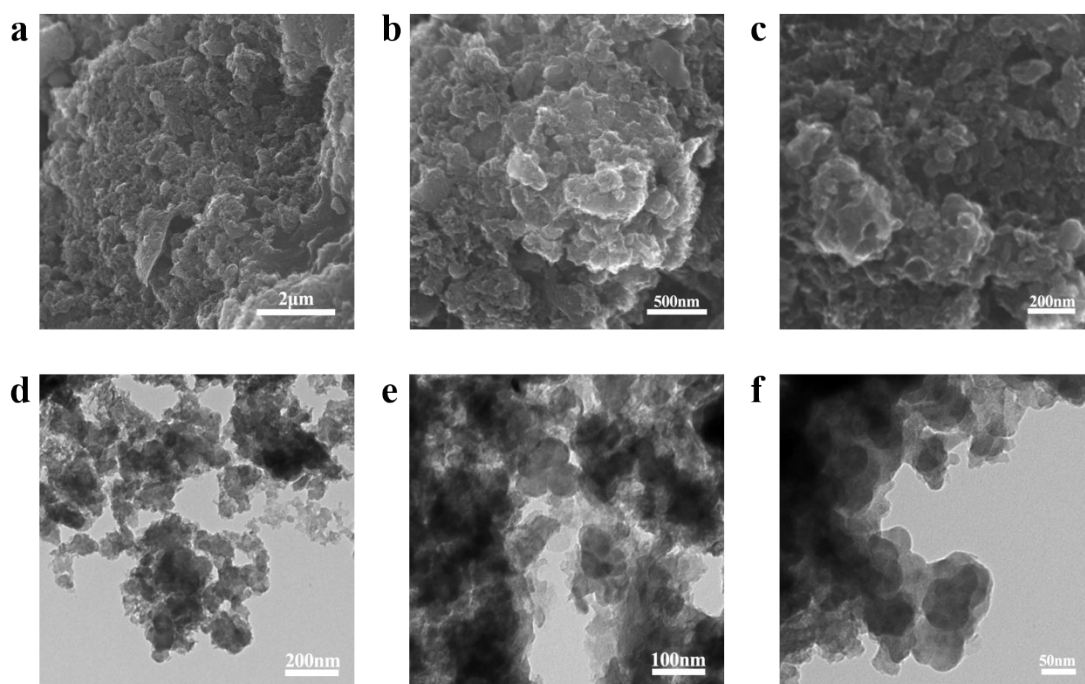

**Figure S4.** a), b) and c) SEM images of Fe/N/C-900. d), e) and f) TEM images of Fe/N/C-900.

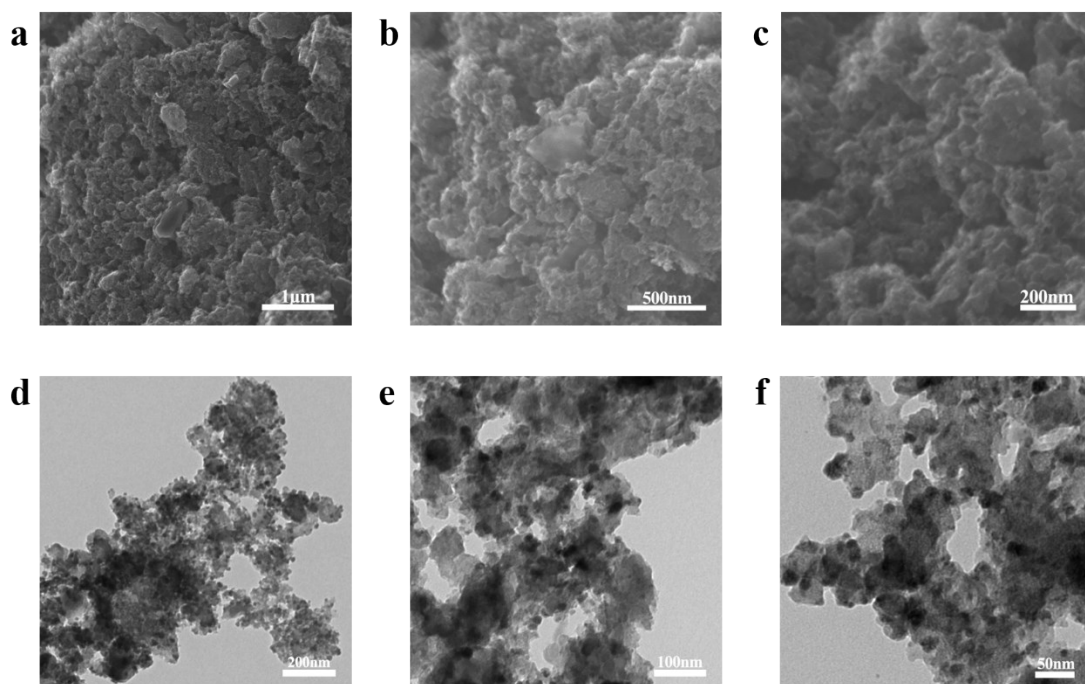

**Figure S5.** a), b) and c) SEM images of Fe/N/C-1000. d), e) and f) TEM images of Fe/N/C-1000.

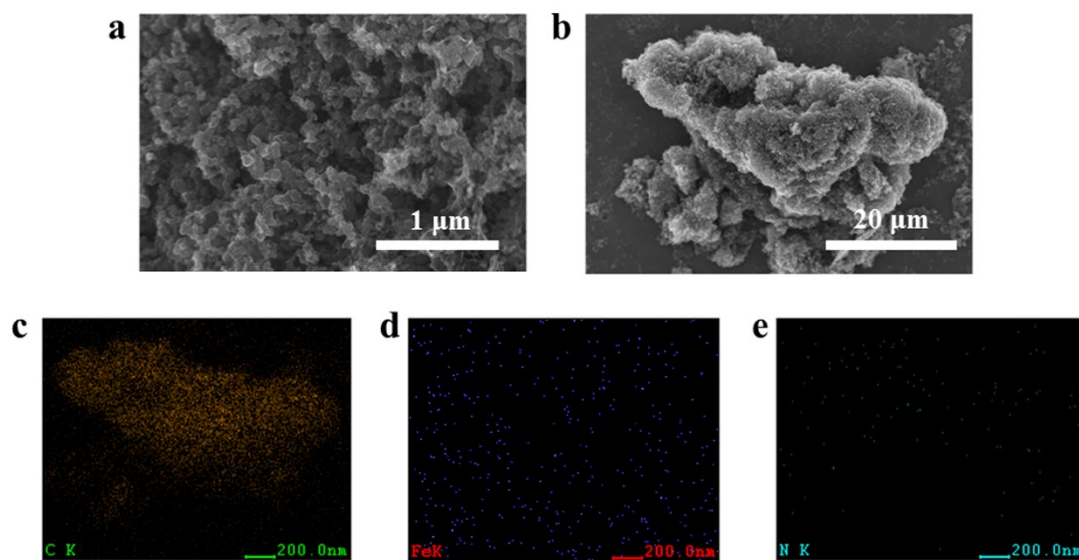

**Figure S6.** a) and b) SEM images of Fe/N/C-900. c), d) and e) Elemental mapping image of Fe/N/C-900.

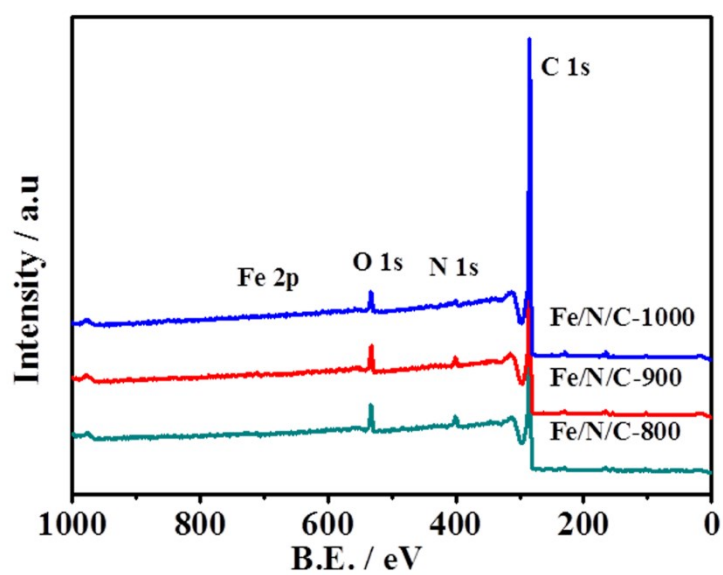

**Figure S7.** Full XPS spectra of Fe/N/C-800, Fe/N/C-900 and Fe/N/C-1000.

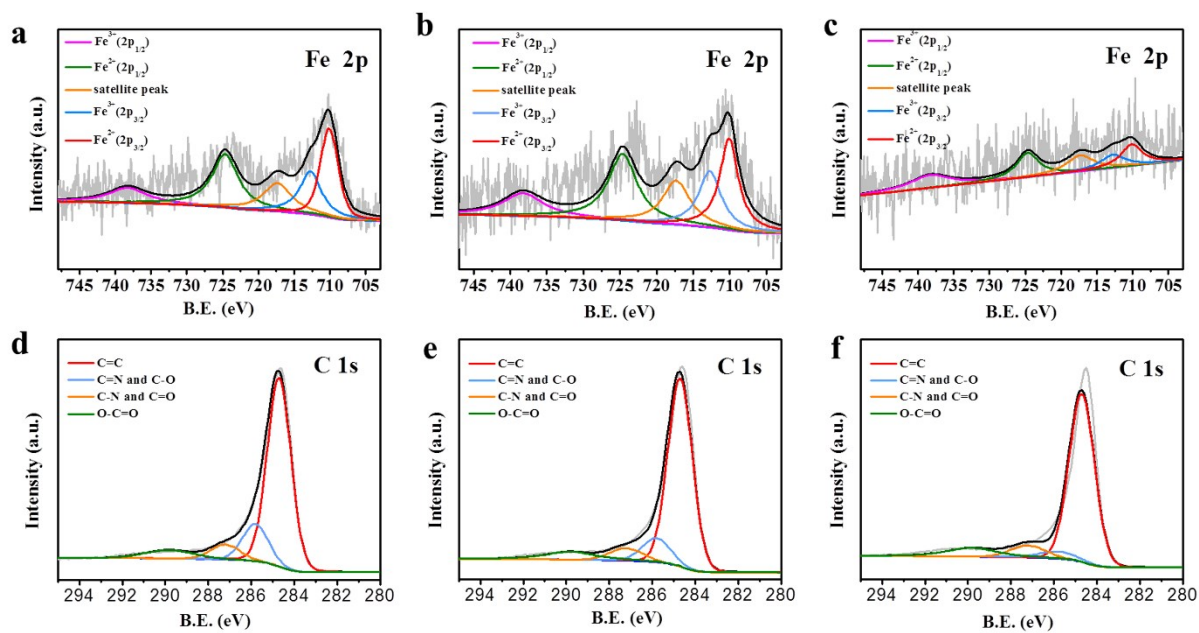

**Figure S8.** The high-resolution Fe 2p spectra of d) Fe/N/C-800, e) Fe/N/C-900 and f) Fe/N/C-1000. The high-resolution C 1s spectra of a) Fe/N/C-800, b) Fe/N/C-900 and

| <b>Sample</b> | <b>BET surface area<br/>(m<sup>2</sup>g<sup>-1</sup>)</b> | <b>Micropore volume<br/>(cm<sup>3</sup>g<sup>-1</sup>)</b> |
|---------------|-----------------------------------------------------------|------------------------------------------------------------|
| Fe/N/C-800    | 219.996                                                   | 0.058                                                      |
| Fe/N/C-900    | 267.018                                                   | 0.139                                                      |
| Fe/N/C-1000   | 177.154                                                   | 0.067                                                      |

c) Fe/N/C-1000.

**Table S1** The BET surface area and pore volume of Fe/N/C-800,900,1000

**Table S2** Summary of performance for ORR in 0.1 M KOH.

| Catalysts            | $E_{\text{onset}}$<br>(V vs. RHE) | $E_{1/2}$<br>(Vs. RHE) | Reference        |
|----------------------|-----------------------------------|------------------------|------------------|
| <b>Fe/N/C-900</b>    | <b>0.98</b>                       | <b>0.82</b>            | <b>This work</b> |
| SA-Fe/NG             | /                                 | 0.8                    | 1                |
| Fe/OES               | 1.0                               | 0.85                   | 2                |
| Fe-N/C-700           | 0.956                             | 0.84                   | 3                |
| Fe-N/C catalyst      | 0.923                             | 0.81                   | 4                |
| p-CNT@Fe1.5@GL       | 0.91                              | 0.81                   | 5                |
| Fe-N x /C catalyst   | 0.94                              | 0.82                   | 6                |
| Fe-ISAs/CN           | 0.9                               | /                      | 7                |
| FeN <sub>4</sub> -GN | 1.05                              | 0.86                   | 8                |
| Fe-N-SCCFs           | 1.03                              | 0.883                  | 9                |
| p-Fe-N-CNFs          | 0.85                              | 0.74                   | 10               |
| Fe-SA/PC-700-5       | /                                 | 0.91                   | 11               |

## References

1. Yang, L.; Cheng, D.; Xu, H.; Zeng, X.; Wan, X.; Shui, J.; Xiang, Z.; Cao, D., Unveiling the high-activity origin of single-atom iron catalysts for oxygen reduction reaction. *Proc Natl Acad Sci U S A* **2018**, *115* (26), 6626-6631.
2. Hou, C. C.; Zou, L.; Sun, L.; Zhang, K.; Liu, Z.; Li, Y.; Li, C.; Zou, R.; Yu, J.; Xu, Q., Single-Atom Iron Catalysts on Overhang-Eave Carbon Cages for High-Performance Oxygen Reduction Reaction. *Angew Chem Int Ed Engl* **2020**, *59* (19), 7384-7389.
3. Yang, Z. K.; Lin, L.; Xu, A. W., 2D Nanoporous Fe-N/C Nanosheets as Highly Efficient Non-Platinum Electrocatalysts for Oxygen Reduction Reaction in Zn-Air Battery. *Small* **2016**, *12* (41), 5710-5719.
4. Lin, L.; Zhu, Q.; Xu, A. W., Noble-metal-free Fe-N/C catalyst for highly efficient oxygen reduction reaction under both alkaline and acidic conditions. *J Am Chem Soc* **2014**, *136* (31), 11027-33.
5. Ahn, S. H.; Yu, X.; Manthiram, A., "Wiring" Fe-Nx -Embedded Porous Carbon Framework onto 1D Nanotubes for Efficient Oxygen Reduction Reaction in Alkaline and Acidic Media. *Adv Mater* **2017**, *29* (26).
6. Wang, Q.; Zhou, Z. Y.; Lai, Y. J.; You, Y.; Liu, J. G.; Wu, X. L.; Terefe, E.; Chen, C.; Song, L.; Rauf, M.; Tian, N.; Sun, S. G., Phenylenediamine-based FeN(x)/C catalyst with high activity for oxygen reduction in acid medium and its active-site probing. *J Am Chem Soc* **2014**, *136* (31), 10882-5.
7. Chen, Y.; Ji, S.; Wang, Y.; Dong, J.; Chen, W.; Li, Z.; Shen, R.; Zheng, L.; Zhuang, Z.; Wang, D.; Li, Y., Isolated Single Iron Atoms Anchored on N-Doped Porous Carbon as an Efficient Electrocatalyst for the Oxygen Reduction Reaction. *Angew Chem Int Ed Engl* **2017**, *56* (24), 6937-6941.
8. Chen, X.; Yu, L.; Wang, S.; Deng, D.; Bao, X., Highly active and stable single iron site confined in graphene nanosheets for oxygen reduction reaction. *Nano Energy* **2017**, *32*, 353-358.
9. Wang, B.; Wang, X.; Zou, J.; Yan, Y.; Xie, S.; Hu, G.; Li, Y.; Dong, A., Simple-Cubic Carbon Frameworks with Atomically Dispersed Iron Dopants toward High-Efficiency Oxygen Reduction. *Nano Lett* **2017**, *17* (3), 2003-2009.
10. Hu, B.-C.; Wu, Z.-Y.; Chu, S.-Q.; Zhu, H.-W.; Liang, H.-W.; Zhang, J.; Yu, S.-H., SiO<sub>2</sub>-protected shell mediated templating synthesis of Fe-N-doped carbon nanofibers and their enhanced oxygen reduction reaction performance. *Energy & Environmental Science* **2018**, *11* (8), 2208-2215.
11. Huo, J.; Lu, L.; Shen, Z.; Liu, Y.; Guo, J.; Liu, Q.; Wang, Y.; Liu, H.; Wu, M.; Wang, G., A rational synthesis of single-atom iron-nitrogen electrocatalysts for highly efficient oxygen reduction reaction. *Journal of Materials Chemistry A* **2020**, *8* (32), 16271-16282.
